# Supplementary material for: A perovskite/silicon hybrid system with a solar-to-electric power conversion efficiency of 25.5%
Source: Royal Society of Chemistry journal article supplement (doi:10.1039/c9ta10712f), 2019-01-01
Supplement: c9ta10712f1.pdf [file c9ta10712f1.pdf]

# Supplementary Information

## A perovskite/silicon hybrid system with solar-to-electric power conversion efficiency of 25.5%

Likai Zheng,<sup>a</sup> Jilei Wang,<sup>a</sup> Yimin Xuan,<sup>\*a</sup> Mengying Yan,<sup>b</sup> Xinxin Yu,<sup>b</sup> Yong Peng<sup>\*b</sup> and Yi-Bing Cheng<sup>b</sup>

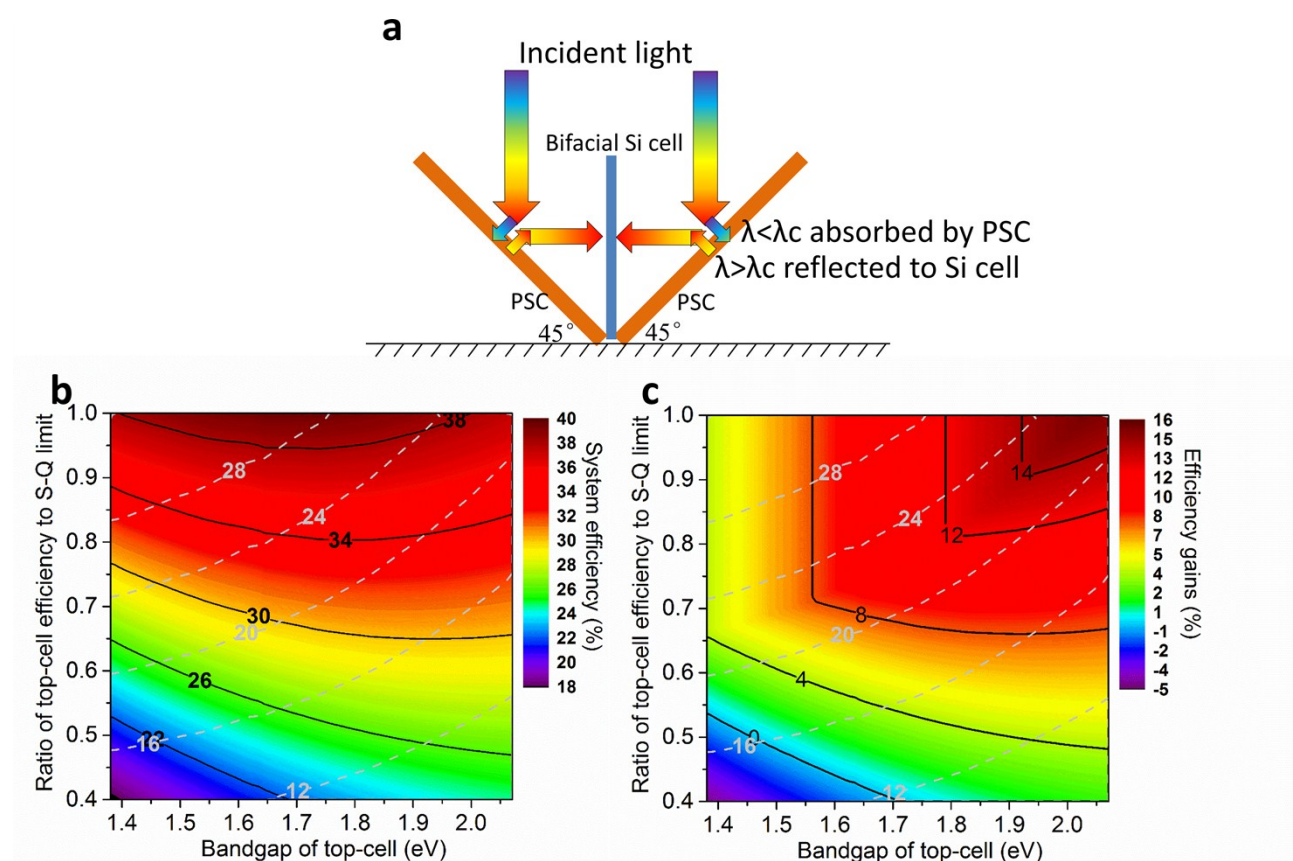

**Fig. S 1** The calculated results of the BRTS with a 22.3% efficient bifacial HIT silicon sub-cell with  $f_1=0$  and  $f_2=1$  in equation (1). **a**, Schematic diagram of incident energy allocation. **b**, The possible efficiency and **c**, the efficiency gains as a function of the top-cell bandgap (abscissa axis) and the ratio of top-cell efficiency to S-Q limit (ordinate axis). The gray dash lines represent the efficiency of the perovskite solar cells (PSCs).

<sup>a</sup> School of Energy and Power Engineering, Nanjing University of Aeronautics and Astronautics, Nanjing 210016, P. R. China.

<sup>b</sup> State Key Laboratory of Advanced Technology for Materials Synthesis and Processing, Wuhan University of Technology, Wuhan 430070, P. R. China.

\* Corresponding author: Y. Xuan (email: ymxuan@nuaa.edu.cn) and P. Yong (email: yongpeng@whut.edu.cn)

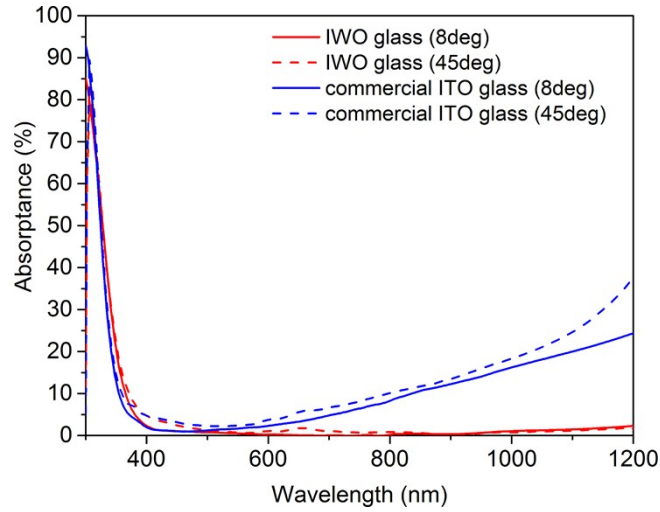

11

12 **Fig. S 2** Wavelength-dependent absorptance curves of fabricated IWO glass (150 nm) and commercial ITO glass (150 nm).  
 13 The solar-weighted absorptance between 750 nm and 1100 nm is 0.6% for IWO glass and 12.4% for ITO glass. The solar-  
 14 weighted absorptance between 300 nm and 750 nm is 2.0% for IWO glass and 3.5% for ITO glass.

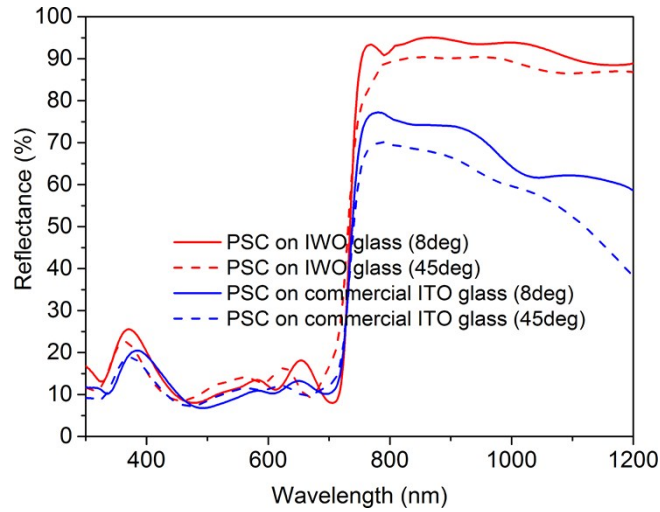

15

16 **Fig. S 3** Wavelength-dependent reflectance curves of PSCs fabricated on IWO glass and commercial ITO glass,  
 17 respectively. The solar-weighted reflectance between 750 nm and 1100 nm is 88.5% for IWO based PSC and 64.4% for  
 18 ITO based PSC at 45°. The solar-weighted reflectance between 300 nm and 750 nm is 16.0% for IWO based PSC and 12.9%  
 19 for ITO based PSC at 45°.

20

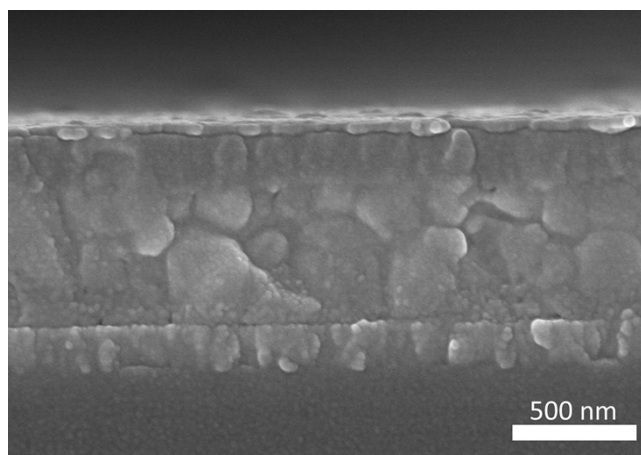

**Fig. S 4** Uncolored FESEM image for the cross section of PSC

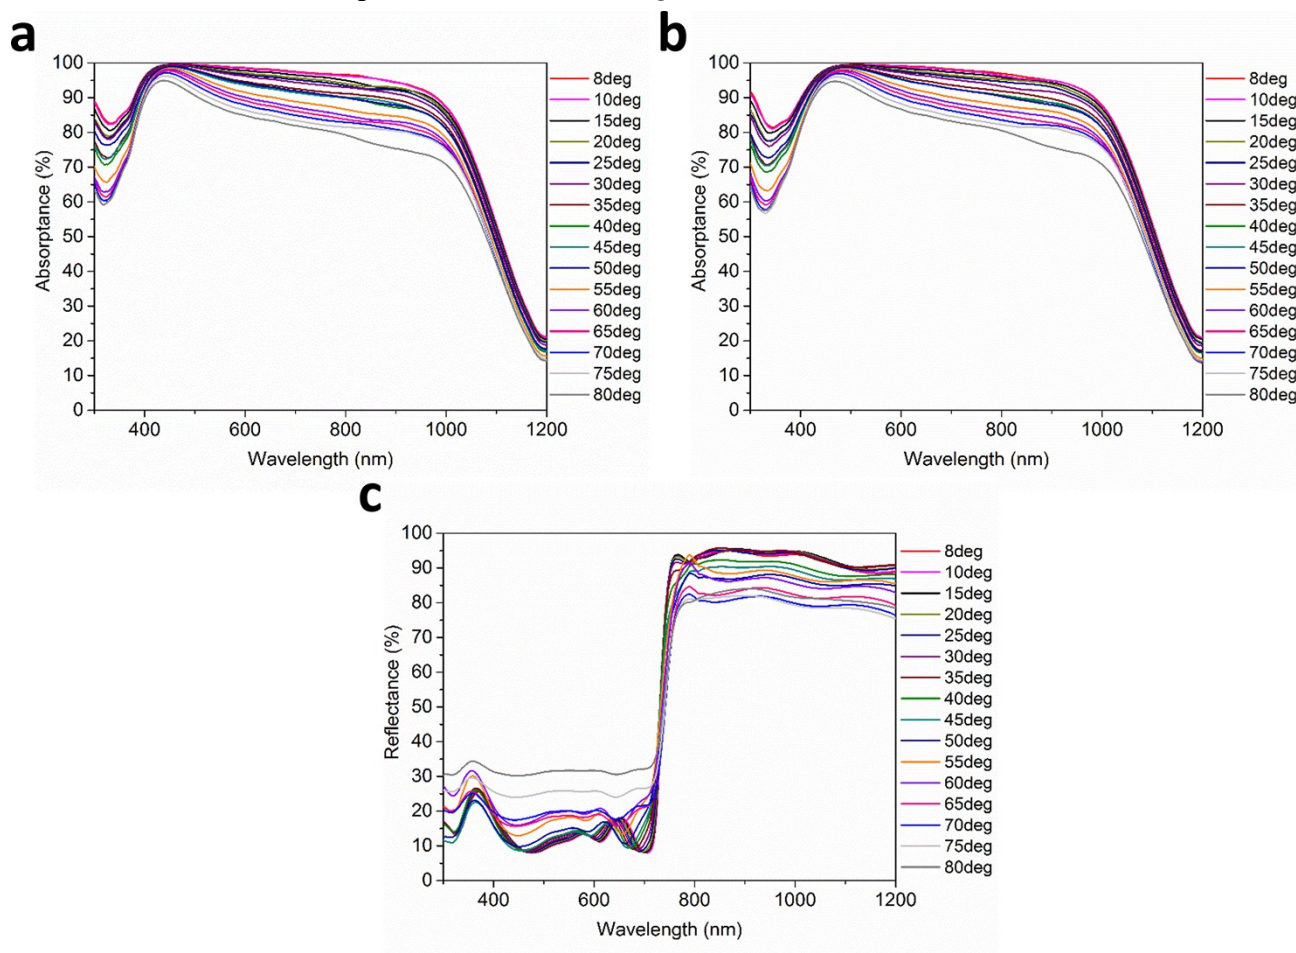

**Fig. S 5** **a**, Wavelength-dependent absorptance curves of the front side of HIT solar cell at various incident angles. **b**, Wavelength-dependent absorptance curves of the rear side of HIT solar cell at various incident angles. **c**, Wavelength-dependent reflectance curves of the PSC at various incident angles.

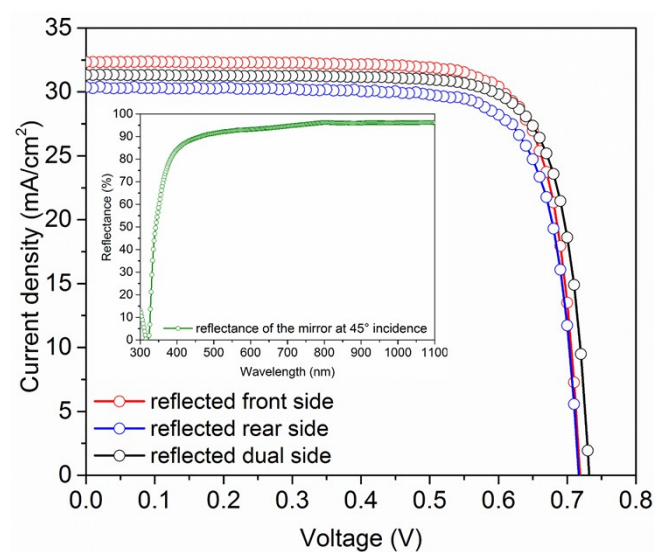

27

28 **Fig. S 6** Performance of a HIT bifacial silicon cell integrated with two mirrors in a V-shape configuration under 1 sun  
 29 illumination. Corresponding parameters are summarized in Table S1. The insert image is the reflectance of the mirror for  
 30 wavelengths of 300 nm-1100 nm at 45° incidence (with solar-weighted reflectance of 92%).

31

32

**Table S 1** The performance of a bifacial HIT silicon solar cell

|                                | $V_{OC}$ (V) | $J_{SC}$ (mA/cm <sup>2</sup> ) | FF    | Efficiency (%) |
|--------------------------------|--------------|--------------------------------|-------|----------------|
| Si cell (reflected front side) | 0.719        | 32.34                          | 0.784 | 18.24          |
| Si cell (reflected rear side)  | 0.717        | 30.33                          | 0.780 | 16.97          |
| Si cell (reflected dual side)  | 0.732        | 31.33                          | 0.788 | 18.07          |

33
